# Supplementary material
Source: publisher figshare collection journal article supplement (https://karger.figshare.com/ndownloader/files/27948783)
Supplement: Supplementary file 1 [file 27948783]

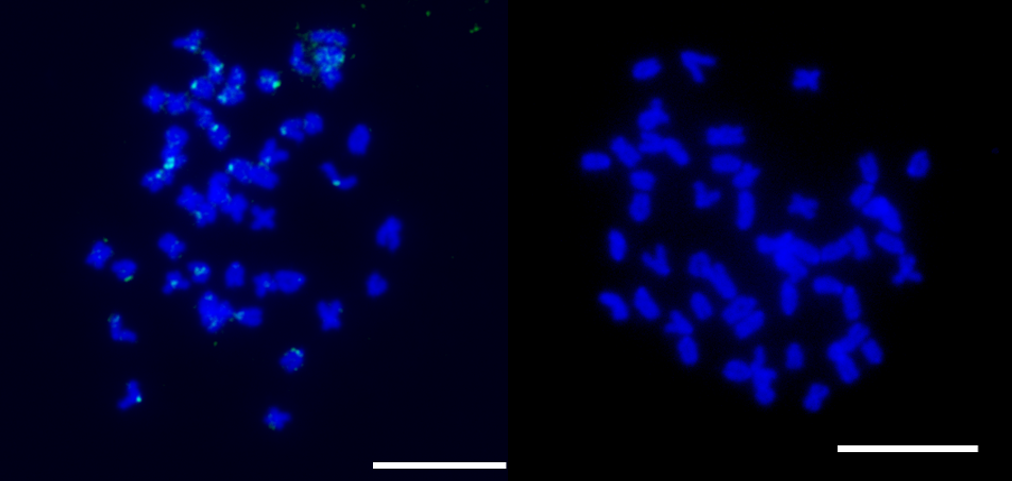


(b)

(a)

**Supplementary Fig. S3.** FISH with ManDra-A 5 repeat probe in somatic cells from wild type dojo loach. Representative metaphase of somatic cells from wild type diploid dojo loach of group A (a) and group B (b) after FISH with ManDra-A 5 repeat probe. The ManDra-A 5 repeat probe was labeled with biotin-16-dUTP and detected by streptavidin Alexa Fluor 488 conjugate (green). All chromosomes were counterstained with DAPI (blue). Scale bars denote 10 μm.
